# Supplementary material for: Pre-Clinical Drug Testing in 2D and 3D Human In Vitro Models of Glioblastoma Incorporating Non-Neoplastic Astrocytes: Tunneling Nano Tubules and Mitochondrial Transfer Modulates Cell Behavior and Therapeutic Respons
Source: Int J Mol Sci. 2019 Nov 29;20(23):6017. doi: 10.3390/ijms20236017 (PMC6929151; doi:10.3390/ijms20236017)
Supplement: Supplementary file 1 [file ijms-20-06017-s001.pdf]

# Supplementary Data.

**Table S1. IC<sub>50</sub> values of TMZ, CLM and VCR in three GBM cell lines and astrocytes.**

| IC <sub>50</sub> (μM)* | Temozolomide | Vincristine    | Clomipramine    |
|------------------------|--------------|----------------|-----------------|
| <b>GBM</b>             |              |                |                 |
| U87-MG                 | >1000 μM     | 3.60 ± 0.62 μM | 16.37 ± 1.53 μM |
| UP-007                 | >1000 μM     | 6.92 ± 1.77 μM | 6.48 ± 2.20 μM  |
| <b>Astrocytes</b>      |              |                |                 |
| UP-010                 | >1000 μM     | 0.14 ± 0.48 μM | 2.40 ± 0.43 μM  |

\*IC<sub>50</sub> value are mean ± standard error of means calculated from 3 independent experiments.

**Figure S1.**

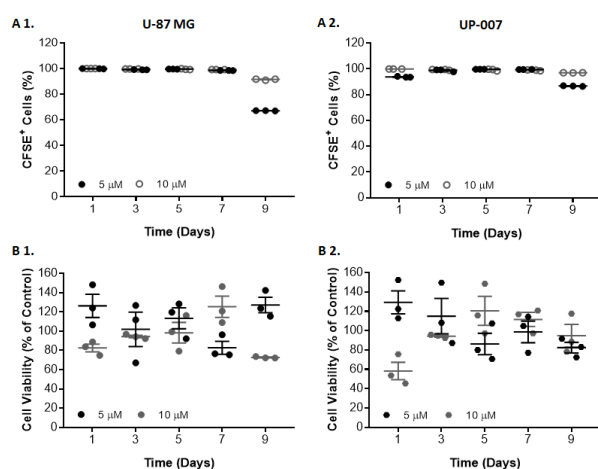

**Fluorescent labelling and viability of GBM cells marked with Cell Trace.** A1-A2) Percentage of CFSE-positive U-87 MG (A1) and UP-007 (A2) over 9 days of culture. Percentage of cells is given compared to an unstained control. B1-B2) Viability of U-87 MG (B1), UP-007 (B2) cells stained with Cell Trace CFSE (5-10 μM) compared to unstained control cells. Mean ± SEM (N=3).

**Figure S2.**

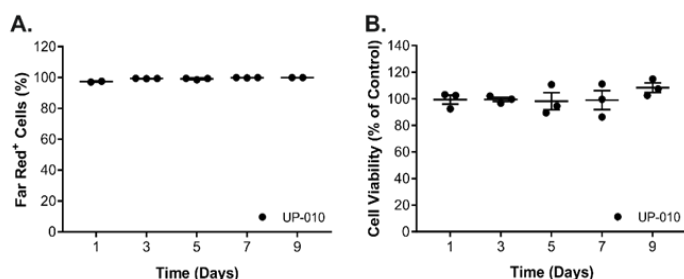

**Fluorescent labelling and viability of astrocytes (UP-010) marked with Cell Trace Far Red.** A) Percentage of Far Red-positive UP-010 cells along 9 days of culture. Percentage of cells is given compared to an unstained control. B) Viability of Far Red-positive UP-010 compared to unstained control cells. Mean ± SEM (N=3).

Figure S3.

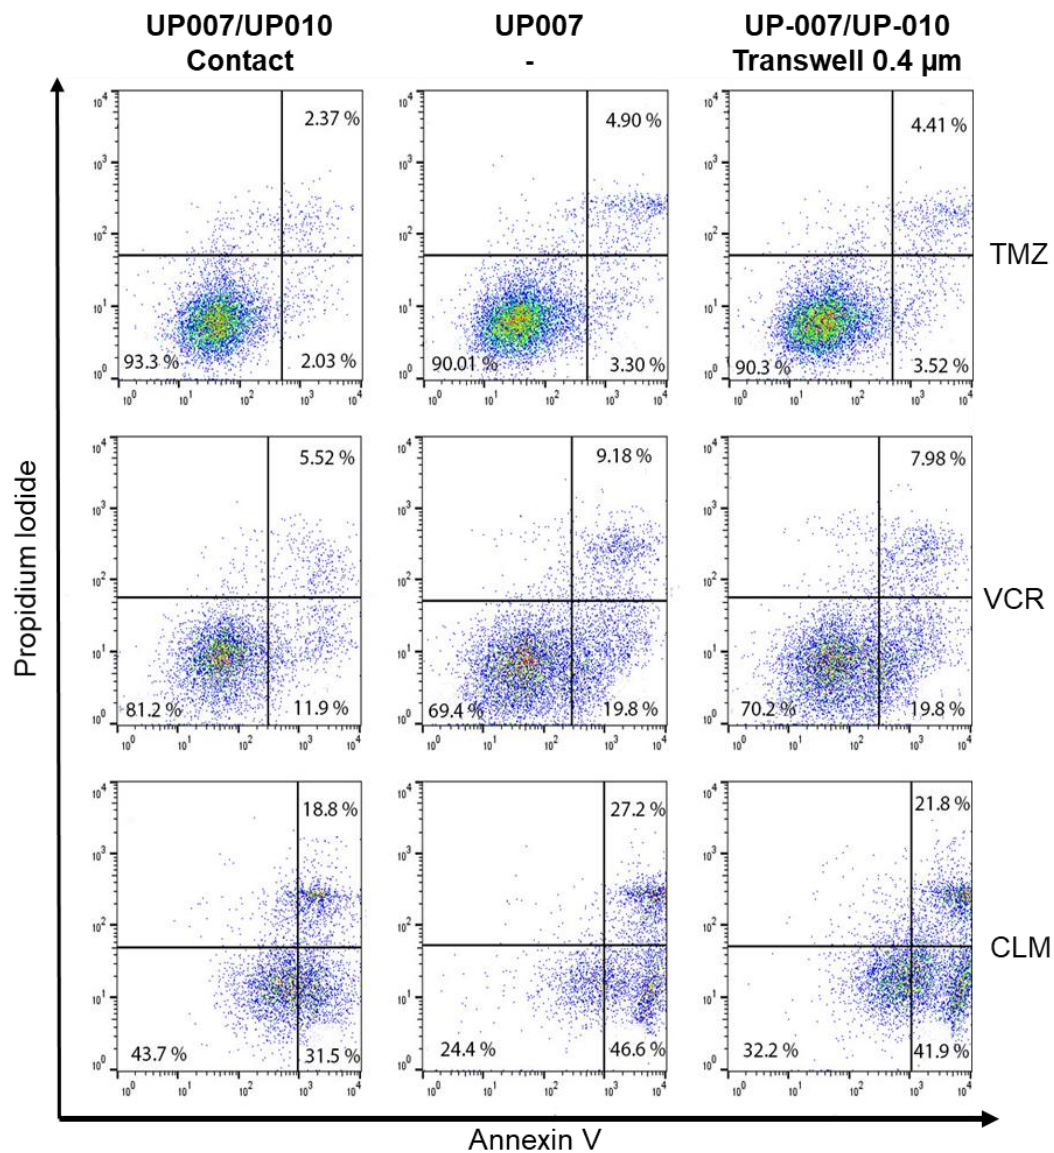

**Astrocytes protect glioblastoma cells from apoptosis by direct contact.** To avoid cell-to-cell contact astrocytes cells (UP-010) were seeded on the top of transwell chamber (pore size 0.4  $\mu\text{m}$ ) while the CFSE glioblastoma cells (UP-007) were seeded on the bottom of 24 well plate. Representative dot plot showed TMZ (400  $\mu\text{M}$ ), VCR (2  $\mu\text{M}$ ) or CLM (20  $\mu\text{M}$ ) induced apoptosis of UP-007 in different culture system.
